# Supplementary material for: Structure–Activity Relationship Target Prediction Studies of Clindamycin Derivatives with Broad-Spectrum Bacteriostatic Antibacterial Properties
Source: MDPI journal article supplement (doi:10.3390/molecules28217357), 2023-10-31
Supplement: s1 [file s1]

# **Structure–Activity Relationship Target Prediction Studies of Clindamycin Derivatives with Broad-Spectrum Bacteriostatic Antibacterial Properties**

Yiduo Jia, Yinmeng Zhang and Hong Zhu \*

School of Chemical Engineering and Pharmacy, Wuhan Institute of Technology, Wuhan 430073, China

\* Correspondence: 04002136@wit.edu.cn

|                                             |   |
|---------------------------------------------|---|
| Minimum inhibitory concentration (MIC)..... | 3 |
| Screening of Selumetinib targets .....      | 3 |

## Minimum inhibitory concentration (MIC)

The MIC values of the compound were determined using the microdilution method using 96-well plates.

To determine the MIC values against gram-positive bacteria, gram-negative bacteria, and fungi, this study cultured gram-positive and gram-negative bacteria in tryptic soy broth (TSB) [14] in a 37 °C bacterial incubator for 24 h. The fungus was cultured in 50 ml TSB and bacterial culture incubator for 48 hours, the bacteria were cultured to the logarithmic stage, 100 µl of the medium was added to each well, and 1 M solution was diluted sequentially by gradient dilution. Secondly, this study sequentially adds 100 µl of bacteria or fungi to each well of the 96-well plate. Finally, this study place the 96-well plates of bacteria in a bacterial incubator at 37 °C for 24 h, while the 96-well plates of fungi are incubated in a bacterial incubator at 22 °C for 48 h. The result is shown in Table S1.

**Table S1. MIC (mmol/L) of all related compounds against bacteria**

| Bacteria                        | Compound 3 | Compound 3e | Compound 4 |
|---------------------------------|------------|-------------|------------|
| <i>E. coli ATCC35218</i>        | 0.0325     | 0.125       | 0.0325     |
| <i>K. pneumoniae ATCC700607</i> | 0.0325     | 0.125       | 0.0325     |
| <i>S. enteritidis CICC21482</i> | 0.0325     | 0.125       | 0.065      |
| <i>P. aeruginosa ATCC27853</i>  | 0.0325     | 0.125       | 0.0325     |
| MRSA clinical isolate           | 0.125      | 0.065       | 0.065      |
| <i>C. albicans CMCC98001</i>    | 0.0325     | 0.125       | 0.0325     |

## Screening of Selumetinib targets

Table S2 Targets of three compounds.

| Common name |       |            |      |            |       |
|-------------|-------|------------|------|------------|-------|
| Compound 3e |       | Compound 4 |      | Compound 3 |       |
| SCN9A       | ABCC1 | PRKDC      | ESR1 | KCNH2      | TTK   |
| HTR1A       | SPHK1 | BACE1      | ESR2 | PIK3CA     | DDOST |
| SLC6A4      | MDM2  | AVPR2      | PAK3 | ADRA1D     | AURKA |

|         |          |         |        |        |        |
|---------|----------|---------|--------|--------|--------|
| CCR1    | TNF      | AVPR1A  | XIAP   | ADRA1A | SCN9A  |
| OPRL1   | ICAM1    | BTK     | PAK6   | ADRA1B | BCL2   |
| OPRK1   | CDK9     | PIK3CB  | PAK4   | OPRL1  | TACR1  |
| DRD4    | HSP90AA1 | PIK3CG  | PAK2   | CCR1   | METAP2 |
| HTR2A   | MKNK2    | PIK3CA  | PAK5   | PIK3CG | PDE5A  |
| ADRA1A  | MAPK14   | SLC6A2  | PAK1   | CHRM2  | IRAK1  |
| DRD3    | ITK      | SLC6A4  | PDE5A  | CHRM1  | IRAK4  |
| KCNH2   | METAP2   | SLC6A3  | CYP3A4 | CHRM3  | PDE6A  |
| PDE4B   | LTA4H    | SIGMAR1 | NOS2   | HTR1B  | MC5R   |
| SIGMAR1 | CDK2     | PDE4B   | ADRB2  | HTR1D  | MAP3K7 |
| EGFR    | CDK1     | AURKB   | ADRB1  | HTR1A  | BAD    |
| PIK3CG  | PRKDC    | ALK     | PIM1   | SLC6A4 | BCL2L2 |
| PIK3CA  | PIK3CB   | RPS6KB1 | PPARG  | HRH1   | CTRB1  |
| IKBKB   | PDE8B    | AURKA   | SLC5A7 | CCR3   | ERBB2  |
| HRH1    | PAK1     | OPRK1   | PIM2   | ABCC1  | PDE11A |
| CCR3    | CHEK1    | F10     | PIM3   | ROCK2  | PDE4B  |
| HTR1D   | PPARA    | CFD     | MC4R   | PIK3CD | PDE4D  |
| ADRA1B  | ADK      | ADORA1  | CCKBR  | HTR2A  | KIFC1  |
| CXCR3   | HSD11B1  | ADORA2A | MC1R   | DRD3   | AXL    |

|        |            |        |                     |          |         |
|--------|------------|--------|---------------------|----------|---------|
| CSF1R  | ADORA1     | LCK    | HSP90AB1            | ADORA2A  | TYRO3   |
| ADRA1D | AGTR1      | TNK2   | MELK                | TRPV3    | MERTK   |
| HTR1B  | PPARG      | TNF    | MC3R                | AKT2     | PDE7A   |
| ADRB2  | SYK        | BCHE   | BIRC2               | AKT1     | PRKD1   |
| ADRB1  | TNIK       | FASN   | CCND3CCND1CDK4CCND2 | AKT3     | ABL1    |
| ADRB3  | FLT3       | HRH3   | MAPK14              | POLR1A   | RET     |
| GABRA5 | SRC        | BCL2   | GSK3B               | HSP90AA1 | ERBB4   |
| PDE5A  | PDE7A      | KCNH2  | PDE4D               | GHSR     | NAMPT   |
| PDE6A  | MAP3K14    | GHSR   | PRKCG               | F10      | PRKCB   |
| HTR4   | CFD        | ACHE   | PRKCD               | EHMT2    | SIGMAR1 |
| AKT2   | PLAT       | DPP4   | PRKCA               | SYK      | MAOA    |
| KDR    | CHRM3      | ABCB1  | PRKCB               | HRH3     | DRD4    |
| AKT3   | ADORA3     | CSF1R  | PRKCE               | PDE8B    | BTK     |
| ERBB2  | MAP2K1     | FLT3   | KCNA5               | GABRA5   | IGF1R   |
| GNRHR  | ADORA2A    | HTR1A  | PDGFRB              | MDM2     | ADRB2   |
| ADRA2A | SPHK2      | ADRA1D | AVPR1B              | EGFR     | ADRB1   |
| ADRA2C | ERBB4      | ADRA1A | BACE2               | BCL2L1   | CFD     |
| ADRA2B | MAP3K7     | ADRA1B | CCR3                | ADRA2A   | JAK3    |
| HTR2C  | ITGB1ITGA4 | AKT1   | KIT                 | ADRA2C   | AURKB   |

|        |            |       |                |         |         |
|--------|------------|-------|----------------|---------|---------|
| ROCK2  | KIT        | KIF11 | PDGFRA         | ADRA2B  | ADORA1  |
| DRD1   | ITGB7ITGA4 | IGF1R | CHRM2          | PIK3CB  | SRC     |
| F10    | AURKB      | ADRB3 | HTR2A          | MAP3K14 | JAK1    |
| HRH4   | RPS6KB1    | P2RX3 | BCL2L1         | CXCR3   | JAK2    |
| TRPV3  | AURKA      | CHEK1 | CDK2CCNA1CCNA2 | HTR4    | TYK2    |
| PIM1   | HRH2       | WEE1  | JAK3           | HTR2C   | RPS6KB1 |
| PIK3CD | PRKCB      | UTS2R | JAK1           | MAPK14  | LTA4H   |
| PIM2   | MAPK1      | FGFR1 | JAK2           | MAPK1   | HTR2B   |
| PIM3   | CCR8       | OXTR  | TYK2           | KDR     | PIM1    |

---
